# Supplementary material for: CaCML13 Acts Positively in Pepper Immunity Against Ralstonia solanacearum Infection Forming Feedback Loop with CabZIP63
Source: PubMed Central journal article supplement (PMC7312559; doi:10.3390/ijms21114186), 2020-06-11
Supplement: ijms-21-04186-s001.pdf [file ijms-21-04186-s001.pdf]

1 **Supplementary Table**

2 **Table S1.** The specific primers of various genes used in the present study.

| Primer Name             | Primer Sequences (5' to 3') | Purpose      |
|-------------------------|-----------------------------|--------------|
| <i>CaCML13</i> -F1      | ATGGGGAAAGATCTGAGCAA        | Gene cloning |
| <i>CaCML13</i> -R1      | TCACTTGGCAACCATCCTAG        |              |
| <i>CaCML13</i> -R1-1    | CTTGGCAACCATCCTAGCAA        |              |
| <i>CaCML13</i> -VIGS-F2 | TCGGTATCCTTATGCGTTCA        | VIGS vector  |
| <i>CaCML13</i> -VIGS-R2 | TTCCGAAGCCTCAAGTTTCT        |              |
| <i>CaCML13</i> -F3      | TGAGTGGATCCGTGAGGTTG        | qRT-PCR      |
| <i>CaCCM13</i> -R3      | CTTGGCAACCATCCTAGCAA        |              |
| <i>CaPR1</i> -F         | GCCGTGAAGATGTGGGTCAATGA     | qRT-PCR      |
| <i>CaPR1</i> -R         | TGAGTTACGCCAGACTACCTGAGTA   |              |
| <i>CaNPR1</i> -F        | ACTTCTTCGCCGACGCCAAG        | qRT-PCR      |
| <i>CaNPR1</i> -R        | GCCAACACATTCACCAGAGCATC     |              |
| <i>CaDEF1</i> -F        | CACTCCATGCGTTTCTTTGC        | qRT-PCR      |
| <i>CaDEF1</i> -R        | CCCTTGAAACGATGGCTCTG        |              |
| <i>CabZIP63</i> -F      | ACGACATTGCCGATCAATTA        | qRT-PCR      |
| <i>CabZIP63</i> -R      | GCAAACGATGCGGTATTAGA        |              |
| <i>CaCML13</i> -G-box-F | TGACATCGAAGTCCAGTCACG       | ChIP-PCR     |
| <i>CaCML13</i> -G-box-R | ACGTGAACTTTGTCTTCGTCG       |              |
| <i>CaCML13</i> -CK-F    | AGAGCAACTAAAGCATTTCGCA      | ChIP-PCR     |
| <i>CaCML13</i> -CK-R    | GGTTTGATTGAAAAGAAAAATTAGGCA |              |
